# Supplementary material for: A large randomised controlled intervention trial to prevent gastric cancer by eradication of Helicobacter pylori in Linqu County, China: baseline results and factors affecting the eradication
Source: HighWire-hosted journal article supplement (doi:10.1136/gutjnl-2015-309197), 2015-05-18
Supplement: gutjnl-2015-309197supp.pdf [file gutjnl-2015-309197supp.pdf]

Supplementary Table 1. Interventions and schedule of administration in group A and B

|                      | Group A |       |       | Group B |         |         |
|----------------------|---------|-------|-------|---------|---------|---------|
|                      | 06:00   | 12:00 | 18:00 | 06:00   | 12:00   | 18:00   |
| Omeprazole (mg)      | 20      |       | 20    | 20      |         | placebo |
| Tetracycline (mg)    | 750     | 750   | 750   | placebo | placebo | placebo |
| Metronidazole (mg)   | 400     | 400   | 400   | placebo | placebo | placebo |
| Bismuth citrate (mg) | 300     |       | 300   | 300     |         | placebo |

Supplementary Table 2. Prevalence of *H. pylori* infection stratified by sex, age and township <sup>a</sup>

| Characteristics | No. of participants | <i>H. pylori</i> positive | <i>P</i> <sup>b</sup> |
|-----------------|---------------------|---------------------------|-----------------------|
| Total           | 183970              | 105973 (57.6)             |                       |
| Sex             |                     |                           | < 0.0001              |
| Men             | 84353               | 49765 (59.0)              |                       |
| Women           | 99617               | 56208 (56.4)              |                       |
| Age, years      |                     |                           | <0.0001               |
| 25-29           | 19438               | 11571 (59.5)              |                       |
| 30-34           | 14399               | 8578 (59.6)               |                       |
| 35-39           | 25882               | 15388 (59.5)              |                       |
| 40-44           | 38485               | 22650 (58.9)              |                       |
| 45-49           | 44081               | 25146 (57.0)              |                       |
| 50-54           | 41685               | 22640 (54.3)              |                       |
| Township        |                     |                           | <0.0001               |
| Xinzhai         | 22361               | 13221 (59.1)              |                       |
| Yishan          | 17724               | 10757 (60.7)              |                       |
| Sitou           | 15352               | 8952 (58.3)               |                       |
| Yeyuan          | 17044               | 9429 (55.3)               |                       |
| Jiushan         | 12298               | 6732 (54.7)               |                       |
| Wujing          | 15420               | 8902 (57.7)               |                       |
| Dongcheng       | 27903               | 16465 (59.0)              |                       |
| Chengguan       | 21670               | 13006 (60.0)              |                       |
| Longgang        | 19342               | 10530 (54.4)              |                       |
| Liushan         | 13502               | 7231 (53.6)               |                       |
| Other           | 1354                | 748 (55.2)                |                       |

<sup>a</sup> Data are presented as n or n (%)

<sup>b</sup> *P* value was calculated by Chi-Square Test

Supplementary Table 3. Side-effects in the different treatment groups <sup>a</sup>

| Side-effects            | Group A (n=44345) | Group B (n=43930) | <i>P</i> <sup>b</sup> |
|-------------------------|-------------------|-------------------|-----------------------|
| Rash                    | 193 (0.43)        | 118 (0.27)        | < 0.0001              |
| Itch skin               | 22 (0.05)         | 13 (0.03)         | 0.1352                |
| Edema                   | 21 (0.05)         | 11 (0.03)         | 0.0816                |
| Nausea and vomiting     | 567 (1.28)        | 217 (0.49)        | < 0.0001              |
| Abdominal pain          | 47 (0.11)         | 25 (0.06)         | 0.0107                |
| Distention and diarrhea | 24 (0.05)         | 20 (0.05)         | 0.5673                |
| Headache                | 24 (0.04)         | 14 (0.03)         | 0.1110                |
| Dizziness               | 18 (2.07)         | 12 (0.03)         | 0.2847                |
| Total                   | 916 (2.3)         | 430 (0.98)        | < 0.0001              |

<sup>a</sup> Data are presented as n (%)

<sup>b</sup> *P* value was calculated by Chi-Square Test
